# Supplementary material for: The Association Between Breast Density and Gut Microbiota Composition at 2 Years Post-Menarche: A Cross-Sectional Study of Adolescents in Santiago, Chile
Source: Front Cell Infect Microbiol. 2021 Dec 17;11:794610. doi: 10.3389/fcimb.2021.794610 (PMC8718921; doi:10.3389/fcimb.2021.794610)
Supplement: Supplementary file 5 [file Table_3.xlsx]

## Sheet: Sheet1
Supplementary Table 3. Multivariable PERMANOVA analyses to identify variation (R²) in MetaCyc predicted pathway beta diversity (Bray-Curtis dissimilarity) explained by study characteristics and food-specific dietary intake habits.
														.
	PERMANOVA results	R²	p-value	R²	p-value
	Percent FGV	0.00767	0.573
	Absolute FGV			0.00594	0.815
	Body fat percentage	0.01064	0.299	0.00975	0.351
	Age	0.00334	0.616	0.00337	0.618									.
	Antibiotic use	0.00596	0.241	0.00602	0.211
	Birth mode	0.00267	0.752	0.00294	0.735
	Breast feeding	0.00867	0.466	0.00809	0.554
	Daily caloric intake	0.01725	0.189	0.01732	0.224
	Maternal education	0.00656	0.206	0.00677	0.174
	Ethnicity	0.00409	0.465	0.00369	0.54
	TV hours	0.00971	0.382	0.00993	0.342
	Daily whole grain intake	0.004	0.471	0.00409	0.481
	Daily fruit intake	0.00672	0.188	0.00617	0.212
	Daily vegetable intake	0.00128	0.97	0.0013	0.976
	Daily yogurt intake	0.00191	0.885	0.00207	0.873
	Residuals	0.90739		0.90912
	a Table presents marginal effects for the association of study characteristics to microbial community structure, such that each term was analyzed in a model with all the other variables.
